# Supplementary material for: Sustained Consumption of a Decaffeinated Green Coffee Nutraceutical Has Limited Effects on Phenolic Metabolism and Bioavailability in Overweight/Obese Subjects
Source: MDPI journal article supplement (doi:10.3390/nu14122445), 2022-06-13
Supplement: s1 [file s1]

## **LC-Q-ToF ANALYSIS OF BIOLOGICAL SAMPLES**

Plasma (30  $\mu$ L), urine (5  $\mu$ L) and fecal extracts (5  $\mu$ L) were filtered through 0.45  $\mu$ m cellulose-acetate membrane filters and injected into an Agilent 1200 series LC system coupled to an Agilent 6530A Accurate-Mass Quadrupole Time-Of-Flight (Q-ToF) with ESI-Jet Stream Technology (Agilent Technologies). A reverse-phase Ascentis Express C18 (15 cm x 3 mm, 2.7  $\mu$ m) column (Sigma-Aldrich Quimica, Madrid), preceded by a Supelco 55215-U guard column (3 mm x 5 mm, 2.7  $\mu$ m), was used for separation. Mobile phase A was 0.1% formic acid in Milli-Q water, and mobile phase B was acetonitrile containing 0.1% formic acid at a 0.3 mL/min flow rate. The gradient started with 10% B at 0 min, 30% B at 10 min, 40% B at 15 min, reaching 50% B at 20 min. The starting gradient was then re-established in 2 min and maintained for 8 min to re-equilibrate the column. Q-ToF acquisition conditions were as follows: drying gas flow (nitrogen, purity > 99.9%) and temperature were 10 L/min and 325°C, respectively; sheath gas flow and temperature were 6 L/min and 250°C, respectively; nebulizer pressure was 25 psi; cap voltage was 3500 V, and nozzle voltage was 500 V. Mass range selected was from 100 up to 970  $m/z$  in negative mode and fragmentor voltage of 150 V. Data were processed in a Mass Hunter Workstation Software.

For metabolite identification and quantitation, calibration curves of available standards were freshly prepared in a pool of plasma, urine and fecal water, respectively, to account for potential matrix effects or losses during sample processing. Phase II metabolites for which there were no commercially available authentic standards were tentatively quantified using the calibration curves of their corresponding phenolic precursors as follows: monohydroxycinnamoyl derivatives were quantified using 5-caffeoylquinic acid as standard; free hydroxycinnamic acids and phase II metabolites of the corresponding parent compounds were quantified with the respective calibration curves of 3',4'-dihydroxycinnamic acid, 4'-hydroxy-3'-methoxycinnamic acid, 4'-hydroxycinnamic acid, 3-(3',4'-dihydroxyphenyl)propanoic acid, 3-(4'-hydroxy-3'-methoxyphenyl)propanoic acid, and 3-(4'-hydroxyphenyl)propanoic acid.

All the standard curves showed a linear response from 5 to 5000 nM as checked by linear regression analysis. Inter- and intra-day precision were considered acceptable (calculated as the coefficient of variation, ranging from 2.5% to 8.5%). Percentage of recovery, and limits of detection (LOD) and quantification (LOQ) are shown bellow.

|                     | <b>Plasma</b> | <b>Urine</b> | <b>Feces</b> |
|---------------------|---------------|--------------|--------------|
| <b>Recovery (%)</b> | 94-102%       | 95-99%       | 96-101%      |
| <b>LOD (nM)</b>     | 1.5-4         | 3-20         | 0.2-41       |
| <b>LOQ (nM)</b>     | 3-10          | 30-70        | 0.8-136      |

## INTER-INDIVIDUAL VARIABILITY OF PHENOLIC METABOLITES IN PLASMA, URINE AND FECES AT BASELINE AND AFTER 8-WEEK CONSUMPTION OF THE GREEN COFFEE PHENOLIC EXTRACT (GCPE) NUTRACEUTICAL

To better explore the high inter-individual variability in the excretion profiles of phenolic metabolites in urine, feces and also in plasma kinetics, an unsupervised principal components analysis (PCA) was carried out for each biofluid:

**PLASMA:** In this matrix, three principal components (PCs) explained 67.7% of the total variability:

- The first PC described the 48.2% of the observed variation and was positively correlated with a high presence of dihydroferulic acid (DHFA), DHFA-4-glucuronide, DHFA-4-sulfate, DHFA-3-glucuronide, dihydroisoferulic acid (DHIFA), dihydrocaffeic acid (DHCA), as well as 4-hydroxyhippuric acid (circled in green); and inversely correlated with dihydrodimethoxycinnamic acid (DHDMDCA), 4-hydroxybenzoic acid and 4-hydroxy-3-methoxybenzoic acid.
- PC2 explained 11.2% of variability and was positively loaded by 5-feruloyl quinic acid (FQA), 4-FQA, ferulic acid (FA) 4-sulfate, FA 4-glucuronide, feruloylglycine or 3-hydroxyhippuric acid (circled in blue).

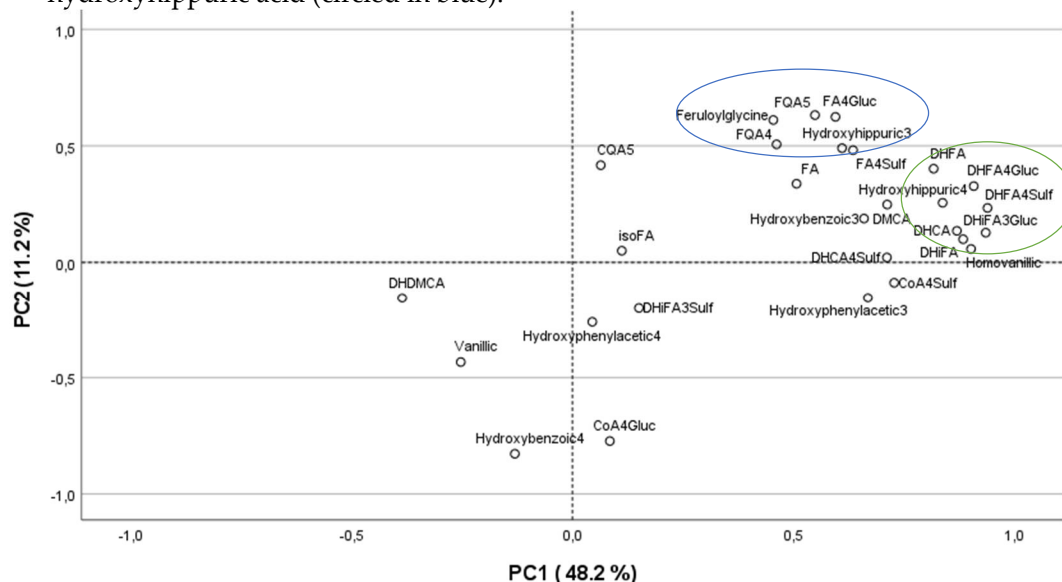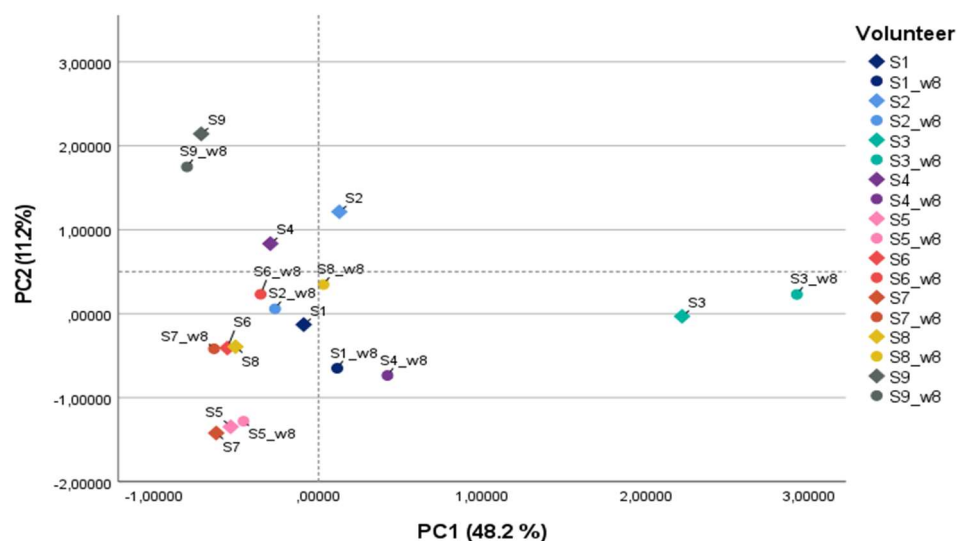

When individual scores with respect to each PC were determined for each participant at the beginning (week 0) and at the end of the intervention (week 8, *w8*), it was possible to observe how plasma accumulation profiles in week-8 did not differ much from baseline (points remaining

**URINE:** Regarding urine samples, four PCs explained 61.8% of the total variability:

- PC1 (22.8% of total variability) was positively linked with an elevated excretion of caffeoylquinic acid (CQA) isoforms (3-CQA, 5-CQA), 5-FQA, *isoferulic acid* (iFA), iFA 3-sulfate, caffeic acid (CA), CA 3-sulfate, DHCA 3-sulfate (circled in green), while it was inversely correlated with dihydrocoumarolyquinic acid (DHCoQA) and 5-dihydroferuloilquinic acid (DHFQA).
- PC2 (14.8% of total variability) had positive component loadings from feruloylglycine and DHFA 4- glucuronide (circled in blue).

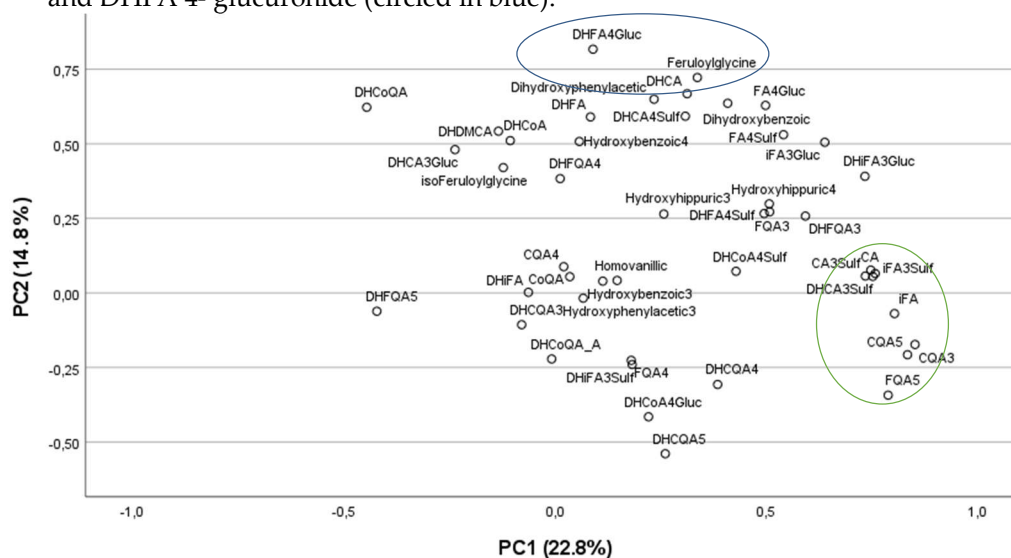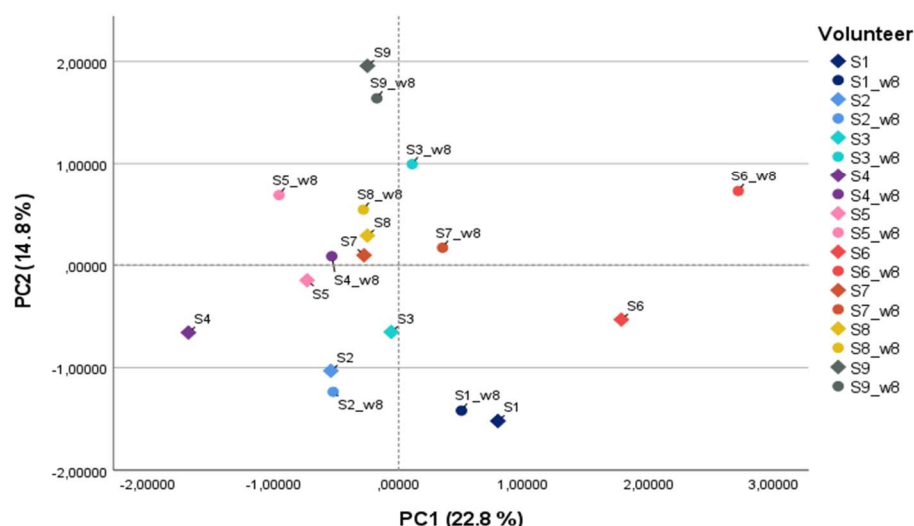

**FECES:** Finally, in faecal samples, four PCs explained 64.6% of the total variability:

- PC1 (22.8% of total variability) was associated with an elevated excretion of 4-hydroxy-3-methoxybenzoic acid, 4'-hydroxy-3'-methoxyphenylacetic acid, 3-hydroxybenzoic acid, 3'-hydroxyphenylacetic acid and coumaric acid (CoA) (circled in green).
- PC2 (16.8% of total variability) was positive loaded to FA, DHFA, dihydrocoumaric acid (DHCoA) and dihydroisocoumaric acid (DHCoA) (circled in blue).

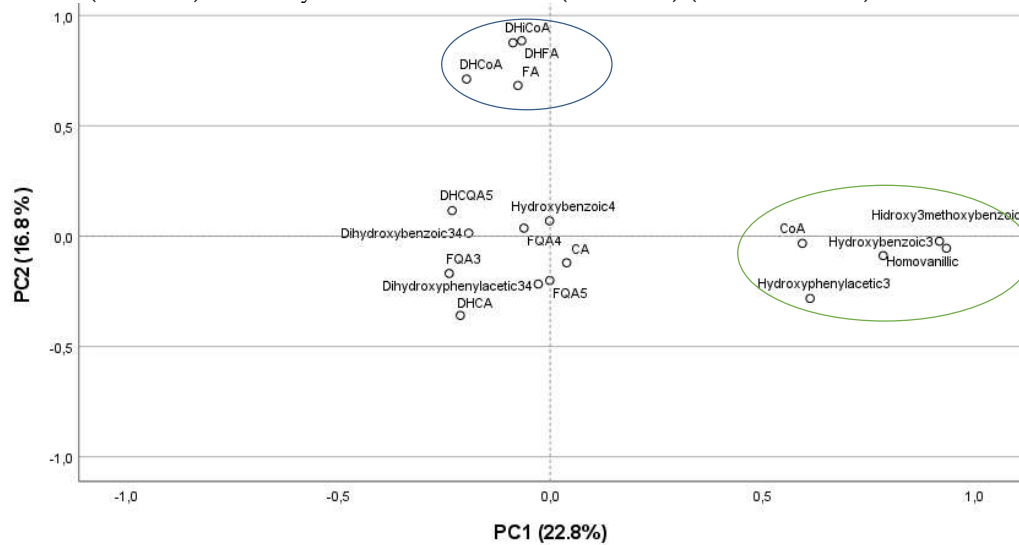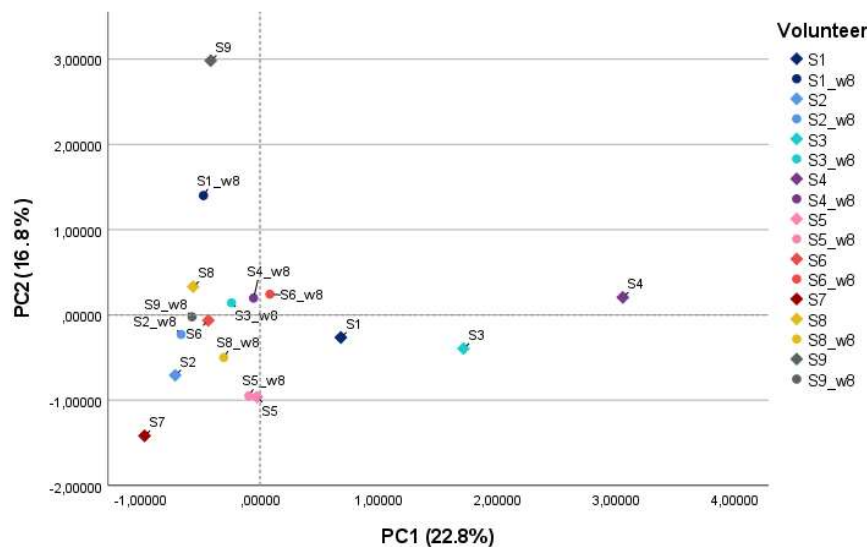

Individual scores indicated that faecal excretion profiles differed considerably from week 0 to week 8 in some volunteers. For instance, the excretions of **subjects #4 and #3** at week 0 displayed high scores for PC1, as well as **subject #9** at week 0 showed high scores for PC2. However, in all these subjects this excretion pattern is not reflected in week 8.

Overall, the groups of phenolic metabolites that contributed most to the observed interindividual variability were distinct for each biofluid. In plasma samples the group with the strongest influence on interindividual variability were the reduced forms of ferulic acid; in urine samples were the quinic acid conjugates of caffeic and ferulic acids; in fecal samples were derived forms of hydroxyphenylacetic and hydroxybenzoic acids. Therefore, there was no clear pattern for all samples. This was notably reflected in the differences observed in the **subjects #3, #9, #6, #4, #5, #1 or #2**, highlighting that the complexity of interindividual variability is a key factor affecting phenolic bioavailability in human studies.

**Table S1** Quantities of polyphenols in the green coffee phenolic extract (GCPE) identified by HPLC-DAD.

| Polyphenols                                          | mg/g d.m. (%)      |
|------------------------------------------------------|--------------------|
| Caffeoylquinic acids                                 | 302 ± 1 (65.9%)    |
| Coumaroylquinic acids                                | 1.23 ± 0.09 (0.3%) |
| Feruloylquinic acids                                 | 35.0 ± 0.5 (7.6%)  |
| Dimethoxycinnamoylquinic acids                       | 0.35 ± 0.07 (0.1%) |
| Dicaffeoylquinic acids                               | 87 ± 1 (19.1%)     |
| Caffeoylferuloylquinic acids                         | 21.2 ± 0.4 (4.6%)  |
| Caffeoylshikimic acids                               | 0.5 ± 0.1 (0.1%)   |
| Coumaroylcaffeoylquinic acids                        | 6.24 ± 0.07 (1.4%) |
| Caffeoyl-glycosides                                  | 1.1 ± 0.1 (0.2%)   |
| 3',4'-Dihydroxycinnamic acid ( <i>Caffeic acid</i> ) | 0.60 ± 0.06 (0.1%) |
| Caffeoyl- <i>N</i> -tryptophan (mg/g)                | 2.57 ± 0.04 (0.6%) |
| <b>Total Hydroxycinnamic acids</b>                   | <b>458 ± 4</b>     |

Values are mean ± standard error ( $n=3$ ). Data in parenthesis are the percentage of (poly)phenols with respect to the total amount quantified. d.m: dry matter

**Table S2** Subject characteristics at baseline (week 0) and after 8 weeks of GCPE intervention.

|                                 | Week 0    | Week 8    | <i>p</i> -value |
|---------------------------------|-----------|-----------|-----------------|
| Glucose (mg/dL)                 | 102 ± 7   | 106 ± 10  | N.S.            |
| Insulin (μUI/mL)                | 13 ± 2    | 13 ± 2    | N.S.            |
| HOMA-IR                         | 3.4 ± 0.7 | 3.7 ± 0.8 | N.S.            |
| Total cholesterol (mg/dL)       | 210 ± 18  | 201 ± 11  | N.S.            |
| Triglycerides (mg/dL)           | 140 ± 42  | 120 ± 18  | N.S.            |
| HDL-Cholesterol (mg/dL)         | 49 ± 3    | 52 ± 2    | N.S.            |
| LDL-Cholesterol (mg/dL)         | 132 ± 13  | 126 ± 8   | N.S.            |
| BMI (kg/m <sup>2</sup> )        | 31 ± 1    | 31 ± 1    | N.S.            |
| Weight (kg)                     | 91 ± 5    | 90 ± 5    | N.S.            |
| Total Fat (%)                   | 34 ± 2    | 34 ± 2    | N.S.            |
| Systolic Blood Pressure (mmHg)  | 131 ± 5   | 128 ± 5   | N.S.            |
| Diastolic Blood Pressure (mmHg) | 87 ± 4    | 86 ± 3    | N.S.            |

Values are mean ± standard error ( $n=9$ ). HOMA-IR: homeostasis model assessment of insulin resistance; HDL: high density lipoprotein; LDL: low-density lipoprotein; BMI: body mass index. N.S.: non-significant differences between week 0 and week 8 ( $p$ -value>0.05)

**Table S3** Chromatographic and spectrometric properties of the identified phenolic metabolites <sup>1</sup>

| Identified Compound                                                                      | RT<br>(min) | Molecular<br>formula                             | [M-H] <sup>-</sup> | Fragment<br>MS <sup>2</sup> | Biofluid |
|------------------------------------------------------------------------------------------|-------------|--------------------------------------------------|--------------------|-----------------------------|----------|
| <b>Caffeic acid metabolites</b>                                                          |             |                                                  |                    |                             |          |
| 3-Caffeoylquinic acid                                                                    | 5.0         | C <sub>16</sub> H <sub>18</sub> O <sub>9</sub>   | 353.0878           | 191                         | U        |
| 5-Caffeoylquinic acid                                                                    | 7.6         | C <sub>16</sub> H <sub>18</sub> O <sub>9</sub>   | 353.0878           | 191                         | P, U     |
| 4-Caffeoylquinic acid                                                                    | 12.6        | C <sub>16</sub> H <sub>18</sub> O <sub>9</sub>   | 353.0878           | 191                         | U        |
| 3',4'-Dihydroxycinnamic acid ( <i>Caffeic acid, CA</i> )                                 | 8.1         | C <sub>9</sub> H <sub>8</sub> O <sub>4</sub>     | 179.0350           | 135                         | U, F     |
| 4'-Hydroxycinnamic acid-3'-sulfate ( <i>CA-3'-sulfate</i> )                              | 8.1         | C <sub>9</sub> H <sub>8</sub> O <sub>7</sub> S   | 258.9918           | 179; 135                    | U        |
| 3-(3',4'-Dihydroxyphenyl)propanoic acid ( <i>Dihydrocaffeic acid, DHCA</i> )             | 6.8         | C <sub>9</sub> H <sub>10</sub> O <sub>4</sub>    | 181.0506           | 137                         | P, U, F  |
| 3-(4'-Hydroxyphenyl)propanoic acid-3'-glucuronide ( <i>DHCA-3'-glucuronide</i> )         | 4.1         | C <sub>15</sub> H <sub>18</sub> O <sub>10</sub>  | 357.0827           | 181; 137                    | U        |
| 3-(3'-Hydroxyphenyl)propanoic acid-4'-sulfate ( <i>DHCA-4'-sulfate</i> )                 | 5.8         | C <sub>9</sub> H <sub>10</sub> O <sub>7</sub> S  | 261.0074           | 181                         | P, U     |
| 3-(4'-Hydroxyphenyl)propanoic acid-3'-sulfate ( <i>DHCA-3'-sulfate</i> )                 | 7.5         | C <sub>9</sub> H <sub>10</sub> O <sub>7</sub> S  | 261.0074           | 181                         | U        |
| 3-Dihydrocaffeoylquinic acid                                                             | 9.5         | C <sub>16</sub> H <sub>20</sub> O <sub>9</sub>   | 355.1035           | 181                         | U        |
| 5-Dihydrocaffeoylquinic acid                                                             | 14.6        | C <sub>16</sub> H <sub>20</sub> O <sub>9</sub>   | 355.1035           | 181                         | U, F     |
| 4-Dihydrocaffeoylquinic acid                                                             | 15.5        | C <sub>16</sub> H <sub>20</sub> O <sub>9</sub>   | 355.1035           | 181                         | U        |
| <b>Ferulic acid metabolites</b>                                                          |             |                                                  |                    |                             |          |
| 3-Feruloylquinic acid                                                                    | 8.4         | C <sub>17</sub> H <sub>20</sub> O <sub>9</sub>   | 367.1035           | 191                         | U, F     |
| 5-Feruloylquinic acid                                                                    | 10.8        | C <sub>17</sub> H <sub>20</sub> O <sub>9</sub>   | 367.1035           | 191                         | P, U, F  |
| 4-Feruloylquinic acid                                                                    | 11.4        | C <sub>17</sub> H <sub>20</sub> O <sub>9</sub>   | 367.1035           | 191                         | P, U, F  |
| 4'-Hydroxy-3'-methoxycinnamic acid ( <i>Ferulic acid, FA</i> )                           | 13.1        | C <sub>10</sub> H <sub>10</sub> O <sub>4</sub>   | 193.0506           | 134                         | P, F     |
| 3'-Hydroxy-4'-methoxycinnamic acid ( <i>isoFerulic acid, iFA</i> )                       | 13.8        | C <sub>10</sub> H <sub>10</sub> O <sub>4</sub>   | 193.0506           | 134                         | P, U     |
| 3'-Methoxycinnamic acid-4'-glucuronide ( <i>FA-4'-glucuronide</i> )                      | 6.1         | C <sub>16</sub> H <sub>18</sub> O <sub>10</sub>  | 369.0827           | 193; 134                    | P, U     |
| 4'-Methoxycinnamic acid-3'-glucuronide ( <i>iFA-3'-glucuronide</i> )                     | 9.4         | C <sub>16</sub> H <sub>18</sub> O <sub>10</sub>  | 369.0827           | 193; 134                    | U        |
| 3'-Methoxycinnamic acid-4'-sulfate ( <i>FA-4'-sulfate</i> )                              | 8.3         | C <sub>10</sub> H <sub>10</sub> O <sub>7</sub> S | 273.0074           | 193; 134                    | P, U     |
| 4'-Methoxycinnamic acid-3'-sulfate ( <i>iFA-3'-sulfate</i> )                             | 9.6         | C <sub>10</sub> H <sub>10</sub> O <sub>7</sub> S | 273.0074           | 193; 134                    | U        |
| 3-(4'-Hydroxy-3'-methoxyphenyl)propanoic acid ( <i>Dihydroferulic acid, DHFA</i> )       | 9.3         | C <sub>10</sub> H <sub>12</sub> O <sub>4</sub>   | 195.0663           | 136                         | P, U, F  |
| 3-(3'-Hydroxy-4'-methoxyphenyl)propanoic acid ( <i>Dihydroisoferulic acid, DHiFA</i> )   | 12.2        | C <sub>10</sub> H <sub>12</sub> O <sub>4</sub>   | 195.0663           | 136                         | P, U     |
| 3-(3'-Methoxyphenyl)propanoic acid-4'-glucuronide ( <i>DHFA-4'-glucuronide</i> )         | 8.1         | C <sub>16</sub> H <sub>20</sub> O <sub>10</sub>  | 371.0984           | 195; 136                    | P, U     |
| 3-(4'-Methoxyphenyl)propanoic acid-3'-glucuronide ( <i>DHiFA-3'-glucuronide</i> )        | 9.6         | C <sub>16</sub> H <sub>20</sub> O <sub>10</sub>  | 371.0984           | 195; 136                    | P, U     |
| 3-(3'-Methoxyphenyl)propanoic acid-4'-sulfate ( <i>DHFA-4'-sulfate</i> )                 | 8.2         | C <sub>10</sub> H <sub>12</sub> O <sub>7</sub> S | 275.0231           | 195; 136                    | P, U     |
| 3-(4'-Methoxyphenyl)propanoic acid-3'-sulfate ( <i>DHiFA-3'-sulfate</i> )                | 12.4        | C <sub>10</sub> H <sub>12</sub> O <sub>7</sub> S | 275.0231           | 195; 136                    | P, U     |
| 3-Dihydroferuloylquinic acid                                                             | 13.1        | C <sub>17</sub> H <sub>22</sub> O <sub>9</sub>   | 369.1191           | 195                         | U        |
| 5-Dihydroferuloylquinic acid                                                             | 13.4        | C <sub>17</sub> H <sub>22</sub> O <sub>9</sub>   | 369.1191           | 195                         | U        |
| 4-Dihydroferuloylquinic acid                                                             | 14.3        | C <sub>17</sub> H <sub>22</sub> O <sub>9</sub>   | 369.1191           | 195                         | U        |
| Feruloylglycine                                                                          | 10.0        | C <sub>12</sub> H <sub>13</sub> O <sub>5</sub> N | 250.0721           | 191; 134                    | P, U     |
| isoFeruloylglycine                                                                       | 11.7        | C <sub>12</sub> H <sub>13</sub> O <sub>5</sub> N | 250.0721           | 191; 134                    | U        |
| <b>Coumaric acid metabolites</b>                                                         |             |                                                  |                    |                             |          |
| 4'-Hydroxycinnamic acid ( <i>Coumaric acid, CoA</i> )                                    | 11.7        | C <sub>9</sub> H <sub>8</sub> O <sub>3</sub>     | 163.0401           | 163                         | F        |
| Coumaroylquinic acid                                                                     | 17.5        | C <sub>16</sub> H <sub>18</sub> O <sub>8</sub>   | 337.0929           | 163                         | U        |
| Cinnamic acid-4'-glucuronide ( <i>Coumaric acid-4'-glucuronide, CoA-4'-glucuronide</i> ) | 12.3        | C <sub>15</sub> H <sub>16</sub> O <sub>9</sub>   | 339.0722           | 163                         | P        |
| Cinnamic acid-4'-sulfate ( <i>CoA-4'-sulfate</i> )                                       | 18.5        | C <sub>9</sub> H <sub>8</sub> O <sub>6</sub> S   | 242.9969           | 163                         | P        |
| 3-(4'-Hydroxyphenyl)propanoic acid ( <i>Dihydrocoumaric acid, DHCouA</i> )               | 12.6        | C <sub>9</sub> H <sub>10</sub> O <sub>3</sub>    | 165.0557           | 121                         | U, F     |
| 3-(3'-Hydroxyphenyl)propanoic acid ( <i>Dihydroisocoumaric acid, DHiCoA</i> )            | 11.2        | C <sub>9</sub> H <sub>10</sub> O <sub>3</sub>    | 165.0557           | 121                         | F        |
| 3-(Phenyl)propanoic acid-4'-glucuronide ( <i>DHCouA-4'-glucuronide</i> )                 | 8.8         | C <sub>15</sub> H <sub>18</sub> O <sub>9</sub>   | 341.0878           | 165                         | U        |
| 3-(Phenyl)propanoic acid-4'-sulfate ( <i>DHCouA-4'-sulfate</i> )                         | 8.8         | C <sub>9</sub> H <sub>10</sub> O <sub>6</sub> S  | 245.0125           | 165                         | U        |
| Dihydrocoumaroylquinic acid                                                              | 16.2        | C <sub>16</sub> H <sub>20</sub> O <sub>8</sub>   | 339.1085           | 165                         | U        |
| Dihydrocoumaroylquinic acid                                                              | 18.0        | C <sub>16</sub> H <sub>20</sub> O <sub>8</sub>   | 339.1085           | 165                         | U        |
| <b>Dimethoxycinnamic acid metabolites</b>                                                |             |                                                  |                    |                             |          |
| 3',4'-Dimethoxycinnamic acid                                                             | 15.1        | C <sub>11</sub> H <sub>12</sub> O <sub>4</sub>   | 207.0652           | 103                         | P        |
| 3-(3',4'-Dimethoxyphenyl)propanoic acid ( <i>Dihydrodimethoxycinnamic acid</i> )         | 15.1        | C <sub>11</sub> H <sub>14</sub> O <sub>4</sub>   | 209.0819           |                             | P, U     |
| <b>Phenolic acids</b>                                                                    |             |                                                  |                    |                             |          |
| 3',4'-Dihydroxyphenylacetic acid                                                         | 6.1         | C <sub>8</sub> H <sub>8</sub> O <sub>4</sub>     | 167.0350           | 123                         | U, F     |
| 4'-Hydroxy-3'-methoxyphenylacetic acid                                                   | 9.8         | C <sub>9</sub> H <sub>10</sub> O <sub>4</sub>    | 181.0506           | 137                         | P, U     |
| 4'-Hydroxyphenylacetic acid                                                              | 10.1        | C <sub>8</sub> H <sub>8</sub> O <sub>3</sub>     | 151.0401           | 107                         | P        |
| 3'-Hydroxyphenylacetic acid                                                              | 8.0         | C <sub>8</sub> H <sub>8</sub> O <sub>3</sub>     | 151.0401           | 107                         | P, U, F  |
| 3,4-Dihydroxybenzoic acid                                                                | 5.3         | C <sub>7</sub> H <sub>6</sub> O <sub>4</sub>     | 153.0193           | 109                         | U, F     |
| 4-Hydroxy-3-methoxybenzoic acid                                                          | 8.9         | C <sub>8</sub> H <sub>8</sub> O <sub>4</sub>     | 167.0350           | 123                         | P, F     |
| 4-Hydroxybenzoic acid                                                                    | 10.0        | C <sub>7</sub> H <sub>6</sub> O <sub>3</sub>     | 137.0244           | 93                          | P, U, F  |
| 3-Hydroxybenzoic acid                                                                    | 8.0         | C <sub>7</sub> H <sub>6</sub> O <sub>3</sub>     | 137.0244           | 93                          | P, U, F  |
| 4'-Hydroxyhippuric acid                                                                  | 14.2        | C <sub>9</sub> H <sub>9</sub> O <sub>4</sub> N   | 194.0459           | 100                         | P, U     |
| 3'-Hydroxyhippuric acid                                                                  | 11.0        | C <sub>9</sub> H <sub>9</sub> O <sub>4</sub> N   | 194.0459           | 100                         | P, U     |

<sup>1</sup> RT: retention time.

**Table S4** Urine kinetic profile of phenolic metabolites after the ingestion of the GCPE nutraceutical at the beginning (week 0) and at the end of the intervention (week 8).

| Metabolite                                                                  | Week 0                |                            |                                              | Week 8                |                            |                                              |
|-----------------------------------------------------------------------------|-----------------------|----------------------------|----------------------------------------------|-----------------------|----------------------------|----------------------------------------------|
|                                                                             | C <sub>max</sub> (μM) | T <sub>max</sub> range (h) | AUC <sub>0-24h</sub> (μM min <sup>-1</sup> ) | C <sub>max</sub> (μM) | T <sub>max</sub> range (h) | AUC <sub>0-24h</sub> (μM min <sup>-1</sup> ) |
| <b>Intestinal Absorption</b>                                                |                       |                            |                                              |                       |                            |                                              |
| 3-Caffeoylquinic acid                                                       | 0.17 ± 0.04           | (0 – 3)                    | 0.9 ± 0.3                                    | 0.15 ± 0.02           | (0 – 6)                    | 1.0 ± 0.2                                    |
| 5-Caffeoylquinic acid                                                       | 0.27 ± 0.05           | (0 – 3)                    | 1.4 ± 0.3                                    | 0.24 ± 0.03           | (0 – 6)                    | 1.5 ± 0.3                                    |
| 4-Caffeoylquinic acid                                                       | 0.2 ± 0.1             | (0 – 24)                   | 1 ± 1                                        | 0.17 ± 0.07           | (0 – 11)                   | 1.4 ± 0.8                                    |
| 3-Feruloylquinic acid                                                       | 0.25 ± 0.06           | (0 – 6)                    | 1.4 ± 0.4                                    | 0.27 ± 0.07           | (0 – 6)                    | 1.8 ± 0.5                                    |
| 5-Feruloylquinic acid                                                       | 1.2 ± 0.3             | (0 – 6)                    | 7 ± 1                                        | 1.1 ± 0.2             | (0 – 6)                    | 8 ± 1                                        |
| 4-Feruloylquinic acid                                                       | 0.3 ± 0.1             | (0 – 6)                    | 1.6 ± 0.6                                    | 0.27 ± 0.08           | (0 – 6)                    | 1.8 ± 0.7                                    |
| Coumaroylquinic acid                                                        | 0.07 ± 0.02           | (0 – 24)                   | 1.2 ± 0.4                                    | 0.08 ± 0.02           | (0 – 24)                   | 0.8 ± 0.2                                    |
| 3',4'-Dihydroxycinnamic acid<br>(Caffeic acid, CA)                          | 0.24 ± 0.06           | (0 – 9)                    | 2.5 ± 0.4                                    | 0.34 ± 0.08           | (0 – 11)                   | 3.7 ± 0.9                                    |
| 4'-Hydroxycinnamic acid-3'-sulfate<br>(CA-3'-sulfate)                       | 2.2 ± 0.5             | (0 – 6)                    | 22 ± 4                                       | 3.1 ± 0.8             | (0 – 11)                   | 35 ± 9                                       |
| 3'-Hydroxy-4'-methoxycinnamic acid<br>(isoFerulic acid, iFA)                | 1.6 ± 0.4             | (0 – 6)                    | 8 ± 2                                        | 1.7 ± 0.2             | (0 – 6)                    | 13 ± 2                                       |
| 3'-Methoxycinnamic acid-4'-glucuronide<br>(FA-4'-glucuronide)               | 1.5 ± 0.2             | (0 – 24)                   | 45 ± 23                                      | 2.3 ± 0.5             | (0 – 24)                   | 30 ± 6                                       |
| 4'-Methoxycinnamic acid-3'-glucuronide (iFA-3'-glucuronide)                 | 2.1 ± 0.3             | (0 – 11)                   | 29 ± 3*                                      | 4 ± 1                 | (0 – 11)                   | 51 ± 12*                                     |
| 3'-Methoxycinnamic acid-4'-sulfate<br>(FA-4'-sulfate)                       | 15 ± 2                | (0 – 24)                   | 225 ± 33                                     | 21 ± 5                | (0 – 24)                   | 283 ± 55                                     |
| 4'-Methoxycinnamic acid-3'-sulfate<br>(iFA-3'-sulfate)                      | 0.8 ± 0.2             | (0 – 11)                   | 8 ± 2*                                       | 1.4 ± 0.5             | (0 – 11)                   | 19 ± 7*                                      |
| <b>Colonic absorption</b>                                                   |                       |                            |                                              |                       |                            |                                              |
| 3-(3',4'-Dihydroxyphenyl)propanoic acid<br>(Dihydrocaffeic acid, DHCA)      | 7.7 ± 0.7**           | (11 – 24)                  | 96 ± 16*                                     | 10 ± 1**              | (11 – 24)                  | 125 ± 18*                                    |
| 3-(4'-Hydroxy-3'-methoxyphenyl)propanoic acid<br>(Dihydroferulic, DHFA)     | 0.19 ± 0.09           | (3 – 9)                    | 2 ± 1                                        | 0.4 ± 0.2             | (3 – 9)                    | 4 ± 2                                        |
| 3-(3'-Hydroxy-4'-methoxyphenyl)propanoic acid<br>(Dihydroisoferulic, DHiFA) | 2.7 ± 0.6             | (6 – 24)                   | 27 ± 4                                       | 2.5 ± 0.7             | (9 – 24)                   | 26 ± 6                                       |
| 3-(4'-Hydroxyphenyl)propanoic acid<br>(Dihydrocoumaric acid, DHCoA)         | 1.7 ± 0.5             | (11 – 24)                  | 21 ± 7                                       | 2.5 ± 0.6             | (9 – 24)                   | 27 ± 8                                       |
| 3-(3',4'-Dimethoxyphenyl)propanoic acid<br>(Dihydrodimethoxycinnamic acid)  | 0.3 ± 0.1             | (11 – 24)                  | 4.1 ± 0.6                                    | 0.32 ± 0.04           | (11 – 24)                  | 4.3 ± 0.5                                    |
| 3-(4'-Hydroxyphenyl)propanoic acid-3'-glucuronide<br>(DHCA-3'-glucuronide)  | 0.23 ± 0.04           | (11 – 24)                  | 3.3 ± 0.7                                    | 0.25 ± 0.04           | (9 – 11)                   | 3.9 ± 0.9                                    |
| 3-(3'-Hydroxyphenyl)propanoic acid-4'-sulfate<br>(DHCA-4'-sulfate)          | 2.2 ± 0.8             | (11 – 24)                  | 31 ± 12                                      | 2.8 ± 0.7             | (11 – 24)                  | 35 ± 9                                       |
| 3-(4'-Hydroxyphenyl)propanoic acid-3'-sulfate<br>(DHCA-3'-sulfate)          | 7 ± 2                 | (11 – 24)                  | 68 ± 19                                      | 11 ± 4                | (9 – 24)                   | 109 ± 42                                     |
| 3-(3'-Methoxyphenyl)propanoic acid-4'-glucuronide<br>(DHFA-4'-glucuronide)  | 2.2 ± 0.4             | (9 – 24)                   | 25 ± 3                                       | 3.0 ± 0.7             | (9 – 24)                   | 32 ± 7                                       |
| 3-(4'-Methoxyphenyl)propanoic acid-3'-glucuronide<br>(DHFA-3'-glucuronide)  | 2.5 ± 0.6             | (9 – 11)                   | 23 ± 4                                       | 4 ± 1                 | (9 – 11)                   | 33 ± 10                                      |
| 3-(3'-Methoxyphenyl)propanoic acid-4'-sulfate<br>(DHFA-4'-sulfate)          | 8 ± 3                 | (9 – 24)                   | 80 ± 19                                      | 11 ± 4                | (9 – 24)                   | 116 ± 38                                     |
| 3-(4'-Methoxyphenyl)propanoic acid-3'-sulfate<br>(DHFA-3'-sulfate)          | 1.7 ± 0.7             | (11 – 24)                  | 20 ± 7                                       | 2.2 ± 0.8             | (11 – 24)                  | 19 ± 5                                       |
| 3-(Phenyl)propanoic acid-4'-glucuronide<br>(DHCoA-4'-glucuronide)           | 1.2 ± 0.2             | (11 – 24)*                 | 15 ± 2                                       | 1.8 ± 0.7             | (9 – 24)*                  | 23 ± 4                                       |
| 3-(Phenyl)propanoic acid-4'-sulfate<br>(DHCoA-4'-sulfate)                   | 12 ± 3                | (11 – 24)*                 | 161 ± 56*                                    | 21 ± 7                | (9 – 24)*                  | 251 ± 65*                                    |
| 3-Dihydrocaffeoylquinic acid                                                | 0.17 ± 0.04           | (11 – 24)                  | 2.7 ± 0.8                                    | 0.21 ± 0.07           | (11 – 24)                  | 2.3 ± 0.6                                    |
| 5-Dihydrocaffeoylquinic acid                                                | 0.03 ± 0.02           | (3 – 9)                    | 0.3 ± 0.1                                    | 0.018 ± 0.009         | (3 – 11)                   | 0.2 ± 0.1                                    |
| 4-Dihydrocaffeoylquinic acid                                                | 0.030 ± 0.007         | (11 – 24)                  | 0.5 ± 0.1                                    | 0.03 ± 0.01           | (9 – 24)                   | 0.4 ± 0.1                                    |
| 3-Dihydroferuloylquinic acid                                                | 0.17 ± 0.08           | (9 – 24)                   | 1.6 ± 0.6**                                  | 0.29 ± 0.07           | (6 – 11)                   | 4 ± 1**                                      |

|                                        |               |           |           |             |           |           |
|----------------------------------------|---------------|-----------|-----------|-------------|-----------|-----------|
| 5-Dihydroferuloylquinic acid           | 0.19 ± 0.1    | (3 – 11)  | 1.9 ± 0.8 | 0.13 ± 0.05 | (3 – 11)  | 1.8 ± 0.8 |
| 4-Dihydroferuloylquinic acid           | 0.03 ± 0.01   | (3 – 11)  | 0.4 ± 0.1 | 0.04 ± 0.02 | (3 – 9)   | 0.4 ± 0.2 |
| Dihydrocoumaroylquinic acid            | 0.4 ± 0.1     | (11 – 24) | 3.3 ± 0.7 | 0.5 ± 0.1   | (9 – 24)  | 4 ± 1     |
| Dihydrocoumaroylquinic acid            | 0.13 ± 0.05   | (11 – 24) | 2 ± 1     | 0.15 ± 0.07 | (11 – 24) | 4 ± 1     |
| Feruloylglycine                        | 8 ± 2         | (9 – 11)  | 173 ± 101 | 10 ± 3      | (6 – 11)  | 108 ± 33  |
| <i>Iso</i> Feruloylglycine             | 0.22 ± 0.01   | (9 – 24)  | 3.2 ± 0.2 | 0.23 ± 0.03 | (6 – 24)  | 3.1 ± 0.6 |
| <b>Other metabolites</b>               |               |           |           |             |           |           |
| 3',4'-Dihydroxyphenylacetic acid       | 0.36 ± 0.05   | (11 – 24) | 4.7 ± 0.8 | 0.41 ± 0.07 | (9 – 24)  | 5.2 ± 0.7 |
| 4'-Hydroxy-3'-methoxyphenylacetic acid | 3.1 ± 0.4     | (11 – 24) | 48 ± 5    | 3.7 ± 0.9   | (9 – 24)  | 49 ± 8    |
| 3'-Hydroxyphenylacetic acid            | 3 ± 1         | (9 – 24)  | 45 ± 12   | 2.0 ± 0.4   | (9 – 24)  | 33 ± 8    |
| 3,4-Dihydroxybenzoic acid              | 0.050 ± 0.006 | (11 – 24) | 0.6 ± 0.1 | 0.07 ± 0.02 | (6 – 11)  | 0.8 ± 0.2 |
| 4-Hydroxybenzoic acid                  | 0.4 ± 0.1     | (9 – 24)  | 4.9 ± 0.4 | 0.25 ± 0.02 | (11 – 24) | 4.3 ± 0.4 |
| 3-Hydroxybenzoic acid                  | 0.23 ± 0.02   | (11 – 24) | 3.7 ± 0.4 | 0.27 ± 0.05 | (9 – 24)  | 4.0 ± 0.7 |
| 4'-Hydroxyhippuric acid                | 3.3 ± 0.6     | (11 – 24) | 49 ± 8    | 3.5 ± 0.9   | (9 – 24)  | 55 ± 12   |
| 3'-Hydroxyhippuric acid                | 13 ± 2        | (9 – 24)  | 169 ± 27  | 16 ± 3      | (9 – 24)  | 204 ± 36  |

Values represent mean ± standard error ( $n = 9$ ). \* $p < 0.05$  \*\* $p < 0.01$   
week 0 vs. week 8.



**Table S5** Amount of urine metabolites excreted 0-24 h after consumption of the GCPE nutraceutical at the beginning of the intervention (week 0)

| Metabolites                                                                     | 0 h         | 0-3 h         | 3-6 h         | 6-9 h         | 9-11 h           | 11-24 h       | TOTAL<br>( moles)  |
|---------------------------------------------------------------------------------|-------------|---------------|---------------|---------------|------------------|---------------|--------------------|
| <b>Intestinal absorption</b>                                                    |             |               |               |               |                  |               |                    |
| 3-Caffeoylquinic acid                                                           | N.D.        | 0.11 ± 0.02   | 0.08 ± 0.03   | 0.022 ± 0.009 | 0.003 ± 0.002    | N.D.          | <b>0.21 ± 0.05</b> |
| 5-Caffeoylquinic acid                                                           | N.D.        | 0.18 ± 0.04   | 0.12 ± 0.04   | 0.03 ± 0.01   | 0.004 ± 0.002    | N.D.          | <b>0.33 ± 0.06</b> |
| 4-Caffeoylquinic acid                                                           | N.D.        | N.D.          | N.D.          | 0.03 ± 0.02   | 0.05 ± 0.04      | 0.05 ± 0.02   | <b>0.13 ± 0.07</b> |
| 3-Feruloylquinic acid                                                           | N.D.        | 0.15 ± 0.04   | 0.10 ± 0.04   | 0.021 ± 0.006 | 0.007 ± 0.004    | 0.010 ± 0.005 | <b>0.29 ± 0.07</b> |
| 5-Feruloylquinic acid                                                           | N.D.        | 0.8 ± 0.2     | 0.5 ± 0.1     | 0.13 ± 0.04   | 0.03 ± 0.01      | 0.09 ± 0.01   | <b>1.5 ± 0.2</b>   |
| 4-Feruloylquinic acid                                                           | N.D.        | 0.2 ± 0.1     | 0.15 ± 0.05   | 0.02 ± 0.01   | 0.003 ± 0.002    | N.D.          | <b>0.4 ± 0.2</b>   |
| Coumaroylquinic acid                                                            | N.D.        | 0.03 ± 0.01   | 0.015 ± 0.003 | 0.017 ± 0.006 | 0.015 ± 0.004    | 0.06 ± 0.02   | <b>0.14 ± 0.03</b> |
| 3',4'-Dihydroxycinnamic acid<br>(Caffeic acid, CA)                              | N.D.        | 0.13 ± 0.03   | 0.08 ± 0.02   | 0.08 ± 0.03   | 0.023 ± 0.008    | 0.12 ± 0.02   | <b>0.42 ± 0.06</b> |
| 4'-Hydroxycinnamic acid-3'-sulfate<br>(CA-3'-sulfate)                           | N.D.        | 1.2 ± 0.3     | 0.7 ± 0.2     | 0.8 ± 0.2     | 0.21 ± 0.06      | 0.9 ± 0.2     | <b>3.7 ± 0.5</b>   |
| 3'-Hydroxy-4'-methoxycinnamic acid<br>(isoFerulic acid, iFA)                    | N.D.        | 1.0 ± 0.2     | 0.35 ± 0.07   | 0.27 ± 0.07   | 0.04 ± 0.03      | 0.04 ± 0.02   | <b>1.7 ± 0.2</b>   |
| 3'-Methoxycinnamic acid-4'-<br>glucuronide (FA-4'-glucuronide)                  | N.D.        | 0.5 ± 0.1     | 0.42 ± 0.07   | 0.7 ± 0.2     | 0.44 ± 0.09      | 1.3 ± 0.3     | <b>3.4 ± 0.4</b>   |
| 4'-Methoxycinnamic acid-3'-<br>glucuronide (iFA-3'-glucuronide)                 | N.D.        | 0.9 ± 0.2     | 0.8 ± 0.2     | 1.1 ± 0.3     | 0.49 ± 0.09      | 1.1 ± 0.2     | <b>4.4 ± 0.5</b>   |
| 3'-Methoxycinnamic acid-4'-sulfate<br>(FA-4'-sulfate)                           | N.D.        | 5 ± 2         | 3.2 ± 0.9     | 7 ± 2         | 3.6 ± 0.7        | 13 ± 2        | <b>32 ± 5</b>      |
| 4'-Methoxycinnamic acid-3'-sulfate<br>(iFA-3'-sulfate)                          | N.D.        | 0.4 ± 0.1     | 0.07 ± 0.04   | 0.24 ± 0.08   | 0.09 ± 0.03      | 0.4 ± 0.1     | <b>1.1 ± 0.3</b>   |
| <b>TOTAL – Intestinal absorption</b>                                            | <b>N.D.</b> | <b>12 ± 3</b> | <b>7 ± 1</b>  | <b>10 ± 2</b> | <b>5.0 ± 0.9</b> | <b>17 ± 3</b> | <b>50 ± 6</b>      |
| <b>Colonic absorption</b>                                                       |             |               |               |               |                  |               |                    |
| 3-(3',4'-Dihydroxyphenyl)propanoic<br>acid (Dihydrocaffeic acid, DHCA)          | 3 ± 1       | 0.5 ± 0.1     | 0.37 ± 0.09   | 2.3 ± 0.8     | 2.7 ± 0.6        | 7 ± 1         | <b>16 ± 2</b>      |
| 3-(4'-Hydroxy-3'-methoxyphenyl)<br>propanoic acid (Dihydroferulic, DHFA)        | 0.2 ± 0.1   | 0.03 ± 0.02   | 0.007 ± 0.007 | 0.08 ± 0.04   | 0.05 ± 0.02      | 0.11 ± 0.05   | <b>0.5 ± 0.2</b>   |
| 3-(3'-Hydroxy-4'-methoxyphenyl)<br>propanoic acid (Dihydroisoferulic,<br>DHiFA) | N.D.        | 0.26 ± 0.04   | 0.25 ± 0.08   | 1.2 ± 0.3     | 0.8 ± 0.2        | 1.2 ± 0.09    | <b>3.7 ± 0.4</b>   |
| 3-(4'-Hydroxyphenyl)propanoic acid<br>(Dihydrocoumaric acid, DHCoA)             | 1.1 ± 0.4   | 0.16 ± 0.04   | 0.09 ± 0.02   | 0.5 ± 0.2     | 0.6 ± 0.2        | 1.4 ± 0.4     | <b>4 ± 1</b>       |
| 3-(3',4'-Dimethoxyphenyl)propanoic<br>acid (Dihydrodimethoxycinnamic acid)      | N.D.        | 0.08 ± 0.02   | 0.08 ± 0.01   | 0.2 ± 0.1     | 0.09 ± 0.02      | 0.27 ± 0.06   | <b>0.7 ± 0.2</b>   |
| 3-(4'-Hydroxyphenyl)propanoic acid-3'-<br>glucuronide (DHCA-3'-glucuronide)     | N.D.        | 0.09 ± 0.03   | 0.07 ± 0.02   | 0.08 ± 0.04   | 0.04 ± 0.02      | 0.30 ± 0.09   | <b>0.6 ± 0.2</b>   |
| 3-(3'-Hydroxyphenyl)propanoic acid-4'-<br>sulfate (DHCA-4'-sulfate)             | 3.5 ± 0.8   | 0.4 ± 0.1     | 0.20 ± 0.04   | 0.5 ± 0.2     | 0.5 ± 0.2        | 2.6 ± 0.8     | <b>8 ± 2</b>       |
| 3-(4'-Hydroxyphenyl)propanoic acid-3'-<br>sulfate (DHCA-3'-sulfate)             | N.D.        | 0.32 ± 0.07   | 0.26 ± 0.07   | 2.5 ± 0.9     | 2.0 ± 0.7        | 4 ± 1         | <b>9 ± 2</b>       |
| 3-(3'-Methoxyphenyl)propanoic acid-4'-<br>glucuronide (DHFA-4'-glucuronide)     | 1.4 ± 0.8   | 0.15 ± 0.05   | 0.16 ± 0.05   | 1.0 ± 0.4     | 0.8 ± 0.1        | 1.2 ± 0.2     | <b>5 ± 1</b>       |
| 3-(4'-Methoxyphenyl)propanoic acid-3'-<br>glucuronide (DHiFA-3'-glucuronide)    | N.D.        | 0.12 ± 0.04   | 0.16 ± 0.06   | 1.1 ± 0.4     | 0.7 ± 0.2        | 0.8 ± 0.2     | <b>2.9 ± 0.5</b>   |
| 3-(3'-Methoxyphenyl)propanoic acid-4'-<br>sulfate (DHFA-4'-sulfate)             | N.D.        | 0.5 ± 0.1     | 0.5 ± 0.1     | 3.4 ± 1.2     | 2.1 ± 0.5        | 3.5 ± 0.8     | <b>10 ± 2</b>      |
| 3-(4'-Methoxyphenyl)propanoic acid-3'-<br>sulfate (DHiFA-3'-sulfate)            | N.D.        | 0.18 ± 0.06   | 0.10 ± 0.04   | 0.4 ± 0.1     | 0.2 ± 0.1        | 1.9 ± 0.8     | <b>3 ± 1</b>       |
| 3-(Phenyl)propanoic acid-4'-<br>glucuronide (DHCoA-4'-glucuronide)              | N.D.        | 0.17 ± 0.06   | 0.10 ± 0.03   | 0.26 ± 0.09   | 0.28 ± 0.07      | 1.3 ± 0.2     | <b>2.1 ± 0.3</b>   |
| 3-(Phenyl)propanoic acid-4'-sulfate<br>(DHCoA-4'-sulfate)                       | N.D.        | 0.9 ± 0.4     | 0.7 ± 0.1     | 3 ± 1         | 3 ± 1            | 12 ± 4        | <b>21 ± 6</b>      |
| 3-Dihydrocaffeoylquinic acid                                                    | N.D.        | 0.06 ± 0.02   | 0.033 ± 0.005 | 0.05 ± 0.02   | 0.04 ± 0.01      | 0.17 ± 0.04   | <b>0.35 ± 0.07</b> |
| 5-Dihydrocaffeoylquinic acid                                                    | N.D.        | 0.012 ± 0.006 | 0.005 ± 0.003 | 0.003 ± 0.002 | 0.003 ± 0.002    | 0.010 ± 0.004 | <b>0.03 ± 0.02</b> |
| 4-Dihydrocaffeoylquinic acid                                                    | N.D.        | 0.011 ± 0.004 | 0.005 ± 0.002 | 0.005 ± 0.002 | 0.006 ± 0.002    | 0.036 ± 0.008 | <b>0.06 ± 0.02</b> |
| 3-Dihydroferuloylquinic acid                                                    | N.D.        | 0.05 ± 0.01   | 0.034 ± 0.006 | 0.029 ± 0.006 | 0.019 ± 0.005    | 0.16 ± 0.09   | <b>0.3 ± 0.1</b>   |
| 5-Dihydroferuloylquinic acid                                                    | N.D.        | 0.12 ± 0.08   | 0.023 ± 0.004 | 0.027 ± 0.009 | 0.013 ± 0.004    | 0.10 ± 0.04   | <b>0.3 ± 0.1</b>   |
| 4-Dihydroferuloylquinic acid                                                    | N.D.        | 0.011 ± 0.004 | 0.008 ± 0.003 | 0.013 ± 0.005 | 0.005 ± 0.003    | 0.019 ± 0.009 | <b>0.06 ± 0.02</b> |
| Dihydrocoumaroylquinic acid                                                     | N.D.        | 0.005 ± 0.002 | 0.005 ± 0.003 | 0.2 ± 0.1     | 0.12 ± 0.05      | 0.14 ± 0.04   | <b>0.5 ± 0.1</b>   |
| Dihydrocoumaroylquinic acid                                                     | N.D.        | 0.04 ± 0.02   | 0.017 ± 0.004 | 0.018 ± 0.005 | 0.022 ± 0.009    | 0.12 ± 0.05   | <b>0.22 ± 0.08</b> |

|                                             |                |               |                  |                |               |                |                 |
|---------------------------------------------|----------------|---------------|------------------|----------------|---------------|----------------|-----------------|
| Feruloylglycine                             | 7 ± 3          | 1.0 ± 0.2     | 0.9 ± 0.3        | 4 ± 1          | 2.6 ± 0.9     | 3.9 ± 0.9      | 19 ± 5          |
| <i>Iso</i> Feruloylglycine                  | N.D.           | 0.04 ± 0.01   | 0.035 ± 0.009    | 0.08 ± 0.02    | 0.11 ± 0.01   | 0.16 ± 0.03    | 0.44 ± 0.04     |
| <b>TOTAL – Colonic absorption</b>           | <b>16 ± 6</b>  | <b>5 ± 1</b>  | <b>4.0 ± 0.7</b> | <b>21 ± 6</b>  | <b>17 ± 4</b> | <b>42 ± 8</b>  | <b>106 ± 16</b> |
| <b>Other microbial metabolites</b>          |                |               |                  |                |               |                |                 |
| 3',4'-Dihydroxyphenylacetic acid            | 0.42 ± 0.08    | 0.12 ± 0.03   | 0.08 ± 0.03      | 0.11 ± 0.05    | 0.06 ± 0.02   | 0.38 ± 0.04    | 1.2 ± 0.2       |
| 4'-Hydroxy-3'-methoxyphenylacetic acid      | 5.9 ± 0.6      | 1.3 ± 0.2     | 0.9 ± 0.2        | 0.9 ± 0.2      | 0.7 ± 0.1     | 3.6 ± 0.3      | 13.2 ± 0.9      |
| 3'-Hydroxyphenylacetic acid                 | 6 ± 1          | 1.6 ± 0.5     | 1.0 ± 0.2        | 0.8 ± 0.2      | 0.53 ± 0.09   | 2.5 ± 0.7      | 12 ± 3          |
| 3,4-Dihydroxybenzoic acid                   | 0.04 ± 0.01    | 0.016 ± 0.005 | 0.007 ± 0.003    | 0.017 ± 0.005  | 0.018 ± 0.006 | 0.035 ± 0.009  | 0.13 ± 0.02     |
| 4-Hydroxybenzoic acid                       | 0.39 ± 0.05    | 0.3 ± 0.2     | 0.11 ± 0.02      | 0.10 ± 0.02    | 0.09 ± 0.01   | 0.29 ± 0.04    | 1.3 ± 0.2       |
| 3-Hydroxybenzoic acid                       | 0.37 ± 0.04    | 0.09 ± 0.02   | 0.05 ± 0.01      | 0.08 ± 0.02    | 0.064 ± 0.009 | 0.26 ± 0.02    | 0.91 ± 0.07     |
| 4'-Hydroxyhippuric acid                     | 7 ± 1          | 1.3 ± 0.3     | 0.7 ± 0.1        | 1.0 ± 0.3      | 0.8 ± 0.2     | 3.8 ± 0.9      | 14 ± 2          |
| 3'-Hydroxyhippuric acid                     | 8 ± 3          | 3 ± 2         | 1.1 ± 0.2        | 4 ± 1          | 5 ± 1         | 11 ± 2         | 32 ± 5          |
| <b>TOTAL – Other microbial metabolites</b>  | <b>27 ± 4</b>  | <b>8 ± 2</b>  | <b>3.8 ± 0.6</b> | <b>7 ± 2</b>   | <b>7 ± 1</b>  | <b>22 ± 2</b>  | <b>75 ± 7</b>   |
| <b>TOTAL Colonic + other microbial met.</b> | <b>43 ± 10</b> | <b>13 ± 3</b> | <b>8 ± 1</b>     | <b>28 ± 8</b>  | <b>24 ± 5</b> | <b>64 ± 10</b> | <b>181 ± 21</b> |
| <b>TOTAL</b>                                | <b>43 ± 10</b> | <b>24 ± 6</b> | <b>14 ± 2</b>    | <b>39 ± 10</b> | <b>29 ± 6</b> | <b>81 ± 11</b> | <b>231 ± 26</b> |
| <b>INTESTINAL+COLONIC+OTHERS</b>            |                |               |                  |                |               |                |                 |

Values represent mean ± standard error ( $n = 9$ ). N.D.: Not detected.

**Table S6** Amount of urine metabolites excreted 0-24 h after consumption of the GCPE nutraceutical at the end of the intervention (week 8).

| Metabolites                                                                       | 0 h         | 0-3 h         | 3-6 h         | 6-9 h         | 9-11 h        | 11-24 h       | TOTAL<br>( moles)    |
|-----------------------------------------------------------------------------------|-------------|---------------|---------------|---------------|---------------|---------------|----------------------|
| <b>Intestinal absorption</b>                                                      |             |               |               |               |               |               |                      |
| 3-Caffeoylquinic acid                                                             | N.D.        | 0.10 ± 0.02   | 0.045 ± 0.008 | 0.028 ± 0.007 | 0.008 ± 0.005 | N.D.          | <b>0.18 ± 0.03</b>   |
| 5-Caffeoylquinic acid                                                             | N.D.        | 0.18 ± 0.04   | 0.08 ± 0.01   | 0.033 ± 0.008 | 0.009 ± 0.007 | 0.006 ± 0.006 | <b>0.33 ± 0.04</b>   |
| 4-Caffeoylquinic acid                                                             | N.D.        | 0.01 ± 0.01*  | 0.008±0.005*  | 0.06 ± 0.03   | 0.05 ± 0.03   | 0.02 ± 0.01   | <b>0.15 ± 0.07</b>   |
| 3-Feruloylquinic acid                                                             | N.D.        | 0.19 ± 0.04   | 0.08 ± 0.02   | 0.05 ± 0.01   | 0.014 ± 0.008 | 0.015 ± 0.007 | <b>0.34 ± 0.07</b>   |
| 5-Feruloylquinic acid                                                             | N.D.        | 0.8 ± 0.1     | 0.39 ± 0.07   | 0.20 ± 0.04   | 0.05 ± 0.03   | 0.08 ± 0.02   | <b>1.5 ± 0.2</b>     |
| 4-Feruloylquinic acid                                                             | N.D.        | 0.21 ± 0.08   | 0.13 ± 0.03   | 0.03 ± 0.01   | N.D.*         | 0.02 ± 0.02   | <b>0.4 ± 0.1</b>     |
| Coumaroylquinic acid                                                              | N.D.        | 0.009 ± 0.003 | 0.007±0.001** | 0.014 ± 0.002 | 0.012 ± 0.004 | 0.06 ± 0.02*  | <b>0.10 ± 0.02*</b>  |
| 3',4'-Dihydroxycinnamic acid<br>(Caffeic acid, CA)                                | N.D.        | 0.12 ± 0.03   | 0.06 ± 0.01   | 0.11 ± 0.02   | 0.06 ± 0.03   | 0.11 ± 0.03   | <b>0.45 ± 0.09</b>   |
| 4'-Hydroxycinnamic acid-3'-sulfate<br>(CA-3'-sulfate)                             | N.D.        | 1.2 ± 0.2     | 0.6 ± 0.1     | 0.9 ± 0.3     | 0.7 ± 0.3     | 1.0 ± 0.3     | <b>4.4 ± 0.8</b>     |
| 3'-Hydroxy-4'-methoxycinnamic acid<br>(isoFerulic acid, iFA)                      | N.D.        | 1.2 ± 0.2     | 0.32 ± 0.04   | 0.39 ± 0.07   | 0.13 ± 0.07   | 0.09 ± 0.04   | <b>2.1 ± 0.2</b>     |
| 3'-Methoxycinnamic acid-4'-<br>glucuronide (FA-4'-glucuronide)                    | N.D.        | 0.6 ± 0.1     | 0.37 ± 0.05   | 0.8 ± 0.1     | 0.8 ± 0.3     | 1.3 ± 0.2     | <b>3.7 ± 0.5</b>     |
| 4'-Methoxycinnamic acid-3'-<br>glucuronide (iFA-3'-glucuronide)                   | N.D.        | 1.4 ± 0.3     | 0.9 ± 0.2     | 1.7 ± 0.3     | 1.0 ± 0.4     | 1.1 ± 0.3     | <b>6 ± 1</b>         |
| 3'-Methoxycinnamic acid-4'-sulfate<br>(FA-4'-sulfate)                             | N.D.        | 4 ± 2         | 3.4 ± 0.7     | 7 ± 1         | 7 ± 2         | 11 ± 2        | <b>33 ± 5</b>        |
| 4'-Methoxycinnamic acid-3'-sulfate<br>(iFA-3'-sulfate)                            | N.D.        | 0.34 ± 0.07   | 0.10 ± 0.03   | 0.32 ± 0.06   | 0.3 ± 0.1     | 1.0 ± 0.7     | <b>2.1 ± 0.9</b>     |
| <b>TOTAL – Intestinal absorption</b>                                              | <b>N.D.</b> | <b>11 ± 2</b> | <b>7 ± 1</b>  | <b>12 ± 2</b> | <b>11 ± 3</b> | <b>16 ± 4</b> | <b>59 ± 8</b>        |
| <b>Colonic absorption</b>                                                         |             |               |               |               |               |               |                      |
| 3-(3',4'-Dihydroxyphenyl)propanoic<br>acid (Dihydrocaffeic acid, DHCA)            | 15 ± 4**    | 1.0 ± 0.4*    | 1.4 ± 0.4**   | 3.8 ± 0.9     | 3.1 ± 0.8     | 6 ± 2         | <b>31 ± 5**</b>      |
| 3-(4'-Hydroxy-3'-methoxyphenyl)<br>propanoic acid (Dihydroferulic, DHFA)          | 0.8 ± 0.3   | 0.08 ± 0.07   | 0.03 ± 0.02   | 0.07 ± 0.05   | 0.09 ± 0.04   | 0.07 ± 0.04   | <b>1.1 ± 0.4</b>     |
| 3-(3'-Hydroxy-4'-methoxyphenyl)<br>propanoic acid (Dihydroisoferulic,<br>DHiFA)   | N.D.        | 0.32 ± 0.07   | 0.38 ± 0.08   | 1.0 ± 0.2     | 0.7 ± 0.2     | 1.0 ± 0.2     | <b>3.2 ± 0.2</b>     |
| 3-(4'-Hydroxyphenyl)propanoic acid<br>(Dihydrocoumaric acid, DHCoA)               | 2.4 ± 0.8** | 0.4 ± 0.2**   | 0.3 ± 0.1*    | 0.9 ± 0.3     | 0.8 ± 0.3     | 1.0 ± 0.2     | <b>6 ± 2**</b>       |
| 3-(3',4'-Dimethoxyphenyl)propanoic<br>acid (Dihydrodimethoxycinnamic acid)        | N.D.        | 0.08 ± 0.01   | 0.06 ± 0.01   | 0.12 ± 0.03   | 0.12 ± 0.04   | 0.25 ± 0.05   | <b>0.63 ± 0.08</b>   |
| 3-(4'-Hydroxyphenyl)propanoic acid-<br>3'-glucuronide (DHCA-3'-glucuronide)       | N.D.        | 0.11 ± 0.04   | 0.06 ± 0.02   | 0.08 ± 0.02   | 0.007 ± 0.03  | 0.20 ± 0.06*  | <b>0.5 ± 0.1</b>     |
| 3-(3'-Hydroxyphenyl)propanoic acid-<br>4'-sulfate (DHCA-4'-sulfate)               | 7 ± 2**     | 0.6 ± 0.2*    | 0.20 ± 0.04   | 0.5 ± 0.1     | 0.6 ± 0.2     | 1.7 ± 0.5*    | <b>10 ± 2*</b>       |
| 3-(4'-Hydroxyphenyl)propanoic acid-<br>3'-sulfate (DHCA-3'-sulfate)               | N.D.        | 0.7 ± 0.2     | 0.6 ± 0.2     | 2.5 ± 0.6     | 3 ± 1         | 2 ± 1*        | <b>9 ± 3</b>         |
| 3-(3'-Methoxyphenyl)propanoic acid-<br>4'-glucuronide (DHFA- 4'-glucuronide)      | 3 ± 1**     | 0.21 ± 0.06   | 0.34 ± 0.09   | 1.0 ± 0.2     | 0.8 ± 0.2     | 1.0 ± 0.3     | <b>7 ± 1*</b>        |
| 3-(4'-Methoxyphenyl)propanoic acid-<br>3'-glucuronide (DHiFA- 3'-<br>glucuronide) | N.D.        | 0.3 ± 0.1     | 0.28 ± 0.07   | 1.1 ± 0.2     | 0.8 ± 0.4     | 0.6 ± 0.3     | <b>3.1 ± 0.7</b>     |
| 3-(3'-Methoxyphenyl)propanoic acid-<br>4'-sulfate (DHFA- 4'-sulfate)              | N.D.        | 0.6 ± 0.1     | 0.8 ± 0.2     | 2 ± 1         | 3 ± 1         | 2.6 ± 0.8     | <b>9 ± 2</b>         |
| 3-(4'-Methoxyphenyl)propanoic acid-<br>3'-sulfate (DHiFA- 3'-sulfate)             | N.D.        | 0.14 ± 0.04   | 0.09 ± 0.03   | 0.24 ± 0.09   | 0.11 ± 0.03   | 2.0 ± 0.7     | <b>2.6 ± 0.8</b>     |
| 3-(Phenyl)propanoic acid-4'-<br>glucuronide (DHCoA-4'-glucuronide)                | N.D.        | 0.23 ± 0.09*  | 0.16 ± 0.05** | 0.56 ± 0.2*   | 0.4 ± 0.1*    | 1.0 ± 0.1**   | <b>1.9 ± 0.3</b>     |
| 3-(Phenyl)propanoic acid-4'-sulfate<br>(DHCoA-4'-sulfate)                         | N.D.        | 2.0 ± 0.8*    | 1.5 ± 0.5     | 5.0 ± 2       | 5 ± 2         | 7 ± 3*        | <b>21 ± 4</b>        |
| 3-Dihydrocaffeoylquinic acid                                                      | N.D.        | 0.025 ± 0.007 | 0.019±0.005*  | 0.04 ± 0.01   | 0.03 ± 0.01   | 0.15 ± 0.06*  | <b>0.27 ± 0.08**</b> |
| 5-Dihydrocaffeoylquinic acid                                                      | N.D.        | 0.004 ± 0.003 | 0.002 ± 0.001 | 0.002 ± 0.002 | 0.002 ± 0.002 | 0.015 ± 0.008 | <b>0.03 ± 0.01</b>   |
| 4-Dihydrocaffeoylquinic acid                                                      | N.D.        | 0.008 ± 0.004 | 0.003 ± 0.002 | 0.004 ± 0.002 | 0.004 ± 0.003 | 0.02 ± 0.01   | <b>0.04 ± 0.02</b>   |
| 3-Dihydroferuloylquinic acid                                                      | N.D.        | 0.11 ± 0.02*  | 0.062±0.008*  | 0.08 ± 0.01** | 0.08 ± 0.02** | 0.14 ± 0.02   | <b>0.5 ± 0.07</b>    |
| 5-Dihydroferuloylquinic acid                                                      | N.D.        | 0.08 ± 0.04   | 0.021±0.008*  | 0.03 ± 0.02   | 0.008 ± 0.003 | 0.04 ± 0.02   | <b>0.18 ± 0.07</b>   |
| 4-Dihydroferuloylquinic acid                                                      | N.D.        | 0.015 ± 0.008 | 0.007 ± 0.004 | 0.011 ± 0.007 | 0.003 ± 0.002 | 0.009 ± 0.005 | <b>0.05 ± 0.02</b>   |
| Dihydrocoumaroylquinic acid                                                       | N.D.        | 0.03 ± 0.02   | 0.009 ± 0.007 | 0.09 ± 0.06   | 0.17 ± 0.06   | 0.09 ± 0.03*  | <b>0.4 ± 0.1</b>     |

|                                             |                  |               |                  |               |                |                |                     |
|---------------------------------------------|------------------|---------------|------------------|---------------|----------------|----------------|---------------------|
| Dihydrocoumaroylquinic acid                 | N.D.             | 0.017 ± 0.007 | 0.010 ± 0.003    | 0.015 ± 0.003 | 0.014 ± 0.005  | 0.12 ± 0.06*   | <b>0.17 ± 0.07*</b> |
| Feruloylglycine                             | 14 ± 4*          | 1.0 ± 0.3     | 1.2 ± 0.3        | 3 ± 1         | 3 ± 1          | 3 ± 1          | <b>25 ± 5</b>       |
| IsoFeruloylglicine                          | N.D.             | 0.13 ± 0.05** | 0.10 ± 0.02**    | 0.12 ± 0.04   | 0.06 ± 0.02*   | 0.17 ± 0.05    | <b>0.6 ± 0.1</b>    |
| <b>TOTAL – Colonic absorption</b>           | <b>42 ± 10**</b> | <b>8 ± 2</b>  | <b>8 ± 2</b>     | <b>23 ± 4</b> | <b>21 ± 6</b>  | <b>30 ± 8</b>  | <b>132 ± 17</b>     |
| <b>Other microbial metabolites</b>          |                  |               |                  |               |                |                |                     |
| 3',4'-Dihydroxyphenylacetic acid            | 0.6 ± 0.1*       | 0.15 ± 0.03   | 0.05 ± 0.02      | 0.08 ± 0.02   | 0.09 ± 0.03*   | 0.31 ± 0.03    | <b>1.3 ± 0.2*</b>   |
| 4'-Hydroxy-3'-methoxyphenylacetic acid      | 5.6 ± 0.8        | 1.5 ± 0.2     | 0.8 ± 0.1        | 1.0 ± 0.2     | 0.68 ± 0.15    | 2.9 ± 0.7*     | <b>12 ± 1</b>       |
| 3'-Hydroxyphenylacetic acid                 | 4 ± 1            | 1.0 ± 0.2     | 0.7 ± 0.2        | 0.7 ± 0.1     | 0.6 ± 0.2      | 1.8 ± 0.6*     | <b>9 ± 2</b>        |
| 3,4-Dihydroxybenzoic acid                   | 0.06 ± 0.03      | 0.03 ± 0.01*  | 0.014 ± 0.003    | 0.027 ± 0.007 | 0.018 ± 0.007  | 0.030 ± 0.009  | <b>0.18 ± 0.04</b>  |
| 4-Hydroxybenzoic acid                       | 0.34 ± 0.06*     | 0.14 ± 0.02   | 0.10 ± 0.01      | 0.09 ± 0.02   | 0.08 ± 0.02    | 0.26 ± 0.03    | <b>1.01 ± 0.09*</b> |
| 3-Hydroxybenzoic acid                       | 0.47 ± 0.08      | 0.10 ± 0.01   | 0.06 ± 0.01      | 0.11 ± 0.02   | 0.07 ± 0.02    | 0.19 ± 0.04*   | <b>1.0 ± 0.1</b>    |
| 4'-Hydroxyhippuric acid                     | 7 ± 1            | 1.5 ± 0.3     | 0.6 ± 0.1        | 1.2 ± 0.2     | 1.1 ± 0.3      | 2.8 ± 0.6      | <b>14 ± 2</b>       |
| 3'-Hydroxyhippuric acid                     | 18 ± 5**         | 4 ± 1*        | 2.6 ± 0.7**      | 6 ± 2         | 5 ± 1          | 9 ± 2*         | <b>46 ± 8**</b>     |
| <b>TOTAL – Other microbial metabolites</b>  | <b>36 ± 5</b>    | <b>9 ± 2</b>  | <b>5.0 ± 0.8</b> | <b>9 ± 2</b>  | <b>8 ± 2</b>   | <b>18 ± 3*</b> | <b>85 ± 8</b>       |
| <b>TOTAL Colonic + other microbial met.</b> | <b>79 ± 14**</b> | <b>17 ± 3</b> | <b>13 ± 2*</b>   | <b>32 ± 6</b> | <b>29 ± 7</b>  | <b>48 ± 10</b> | <b>217 ± 21</b>     |
| <b>TOTAL</b>                                | <b>79 ± 14**</b> | <b>28 ± 5</b> | <b>19 ± 3</b>    | <b>44 ± 6</b> | <b>39 ± 10</b> | <b>61 ± 15</b> | <b>274 ± 30</b>     |
| <b>INTESTINAL+COLONIC+OTHERS</b>            |                  |               |                  |               |                |                |                     |

Values represent mean ± standard error (n=9). \* $p < 0.05$  \*\* $p < 0.01$  week-0 vs. week-8. N.D.: Not detected.
